# Supplementary material for: RFX6 haploinsufficiency predisposes to diabetes through impaired beta cell function
Source: Springer Nature journal article supplement (doi:10.1007/s00125-024-06163-y), 2024-05-14
Supplement: MOESM1 [file 27090342]

## Electronic supplementary material (ESM)

### ***RFX6* haploinsufficiency predisposes to diabetes through impaired beta cell function**

Hazem Ibrahim et al.

#### **Corresponding authors**

Hazem Ibrahim

E-mail: [hazem.ibrahim@helsinki.fi](mailto:hazem.ibrahim@helsinki.fi)

Timo Otonkoski

E-mail: [timo.otonkoski@helsinki.fi](mailto:timo.otonkoski@helsinki.fi)

#### **This PDF file includes:**

ESM Methods

ESM Tables 1 to 6

ESM Figures 1 to 13

## **ESM Methods**

*Tools and software used in bulk RNA-seq analysis*

Fastq filtering: cutadapt (version 2.6)

Mapping / alignment software: STAR (version 2.7.6a)

RNA-seq analysis software: R (version 4.1) using Bioconductor (version 3.14)

Read counting: Rsubread (version 2.8.2)

Venn diagram: ggvenn (version 0.1.8) <https://github.com/yanlinlin82/ggvenn>

Heatmap figures: ComplexHeatmap (version 2.10.0)

Volcano plot, Boxplot, and PCA figures: ggplot2 (version 3.3.5)

Genome annotations: GENCODE GRCh38.p13

RNA-seq adapter sequences:

5'-AGATCGGAAGAGCACACGTCTGAACTCCAGTCA-3' (R1),

5'-AGATCGGAAGAGCGTCGTGTAGGGAAAGAGTGT-3' (R2)

**ESM Table 1 Primers for PCR, CRISPR off-targets and NGS sequencing**

| <b>Primer</b>                        | <b>Sequence</b>                                                                                                      |
|--------------------------------------|----------------------------------------------------------------------------------------------------------------------|
| RFX6 Fw                              | GGCAGTGTTAAAAGGATGCTTTGG                                                                                             |
| RFX6 Rv                              | GGGTGCCTAATTCTGCTTTCTG                                                                                               |
| RFX6 dsDNA Mutation<br>TseI 200bp Fw | TATTATATACTTTCATGTTCTGTTCTTAATGAGTTCATGT<br>TAAAGAAAAAATCTTAACATACTTTTACTCTGCAACTA<br>GATCCAGCATTTTTTGCTGCTTTTGG     |
| RFX6 dsDNA Mutation<br>TseI 200bp Rv | TACCTTATAAAGAATTGAGTCACAAACACAGAAAATATCA<br>ATGATAACAGGATTTTCCAATAAGGGAAGCAAGTGATCAG<br>GCATTCCTTGCCAAAAGCAGCAAAAAAT |
| RFX6 Cpf1 Off-target1 Fw             | TCCCAGGATTAAGTGTGGGG                                                                                                 |
| RFX6 Cpf1 Off-target1 Rv             | TCAATATTTGGTACCTGCCAACT                                                                                              |
| RFX6 Cpf1 Off-target2 Fw             | TCCTGCACAGAGGTCCTACA                                                                                                 |
| RFX6 Cpf1 Off-target2 Rv             | AGCATCATGGGTGTTCTGACT                                                                                                |
| RFX6 Cpf1 Off-target3 Fw             | CAGGGAACGAGGGAGAACTG                                                                                                 |
| RFX6 Cpf1 Off-target3 Rv             | GAGTTTCCTAGGTGGGTGCC                                                                                                 |
| RFX6 cDNA NGSseq Fw                  | <i>ACACTCTTCCCTACACGACGCTCTCCGATCTACTCTGCAAC<br/>TAGATCCAGCATTTT</i>                                                 |
| RFX6 cDNA NGSseq Rv                  | <i>AGACGTGTGCTCTCCGATCTAAGAATTGAGTCACAAACAC<br/>AGAAA</i>                                                            |

**ESM Table 2 Differentiation protocol and media formulations for hESCs**

| Stage              | Reagent                                                                                                                                                                                        | Medium                                                                                                                                                                                                                                                                                       |
|--------------------|------------------------------------------------------------------------------------------------------------------------------------------------------------------------------------------------|----------------------------------------------------------------------------------------------------------------------------------------------------------------------------------------------------------------------------------------------------------------------------------------------|
| Stage 1<br>3 days  | d0: 100 ng/mL human Activin A, 3 $\mu$ mol/l CHIR<br>d1: 100 ng/ml human Activin A, 0.3 $\mu$ mol/l CHIR<br>d2: 100 ng/ml human Activin A                                                      | Basal 1: MCDB131 (10372-019, Life Technologies), 2 mmol/l Glutamax, 1.5 g/l NaHCO <sub>3</sub> (Sigma-Aldrich), 0.5% BSA fraction V Fatty acid free (Sigma-Aldrich), 10 mmol/l glucose                                                                                                       |
| Stage 2<br>3 days  | 0.25 mmol/l Ascorbic acid, 50 ng/ml FGF7                                                                                                                                                       |                                                                                                                                                                                                                                                                                              |
| Stage 3<br>2 days  | 0.25 mmol/l Ascorbic acid, 50 ng/ml FGF7, 0.25 $\mu$ mol/l SANT1, 1 $\mu$ mol/l Retinoic Acid, 100 nmol/l LDN and 200 nmol/l TPB                                                               | Basal 2: MCDB131, 2 mmol/l Glutamax, 2.5 g/l NaHCO <sub>3</sub> , 2% BSA fV, 10 mmol/l glucose, 1:200 ITS-X (51500-056, Life Technologies)                                                                                                                                                   |
| Stage 4<br>4 days  | 0.25 mmol/l Ascorbic acid, 2 ng/ml FGF7, 0.25 $\mu$ mol/l SANT1, 0.1 $\mu$ mol/l Retinoic Acid, 200 nmol/l LDN, 100 ng/ml EGF, 10 mmol/l Nicotinamide, 100 nmol/l TPB and 10 $\mu$ mol/l ROCKi |                                                                                                                                                                                                                                                                                              |
| Stage 5<br>4 days  | 0.25 $\mu$ mol/l SANT1, 0.05 $\mu$ mol/l Retinoic acid, 100 nmol/l LDN, 10 $\mu$ mol/l ALK5inhII, 1 $\mu$ mol/l GC1, 20 ng/ml Betacellulin, 100 nmol/l GSiXX and 5 $\mu$ mol/l ROCKi           | Basal 3: MCDB131, 2 mmol/l Glutamax, 1.5 g/l NaHCO <sub>3</sub> , 2% BSA fV, 20 mmol/l glucose, 1:200 ITS-X, 10 $\mu$ g/ml Heparin (H3149, Sigma-Aldrich), 10 $\mu$ mol/l Zinc Sulfate                                                                                                       |
| Stage 6<br>8 days  | 100 nmol/l LDN, 10 $\mu$ mol/l ALK5inhII, 1 $\mu$ mol/l GC1 and 100 nmol/l GSiXX                                                                                                               |                                                                                                                                                                                                                                                                                              |
| Stage 7<br>21 days | 1 mmol/l N-Acetylcysteine, 10 nmol/l Tri-iodothyronine (T3) and 0.5 $\mu$ mol/l Aurora kinase inhibitor ZM447439                                                                               | CMRL-modified: CMRL 1066 (15-110-CVR, Corning), 2% BSA fV, 2 mmol/l Glutamax, 1:200 ITS-X, Heparin 10 $\mu$ g/ml, 10 $\mu$ mol/l Zinc Sulfate, 5 mmol/l Sodium Pyruvate (Lonza), 1:2000 chemically defined lipid concentrate, 1:2000 medium trace elements A, 1:2000 medium trace elements B |

**ESM Table 3 Differentiation protocol and media formulations for iPSCs**

| <b>Stage</b>       | <b>Reagent</b>                                                                                                                                                 | <b>Medium</b>                                                                                                                                                                          |
|--------------------|----------------------------------------------------------------------------------------------------------------------------------------------------------------|----------------------------------------------------------------------------------------------------------------------------------------------------------------------------------------|
| Stage 1<br>2 days  | d0: 100 ng/ml human Activin A, 3 µmol/l CHIR<br>d1: 100 ng/ml human Activin A, 0.3 µmol/l CHIR                                                                 | Basal 1: MCDB131 (10372-019, Life Technologies), 2 mmol/l Glutamax, 1.5 g/l NaHCO <sub>3</sub> (Sigma-Aldrich), 0.5% BSA fraction V Fatty acid free (Sigma-Aldrich), 10 mmol/l glucose |
| Stage 2<br>3 days  | 0.25 mmol/l Ascorbic acid, 50 ng/ml FGF7                                                                                                                       |                                                                                                                                                                                        |
| Stage 3<br>2 days  | 0.25 mmol/l Ascorbic acid, 50 ng/ml FGF7, 0.25 µmol/l SANT1, 1 µmol/l Retinoic Acid, 100 nmol/l LDN and 200 nmol/l TPB                                         | Basal 2: MCDB131, 2 mmol/l Glutamax, 2.5 g/l NaHCO <sub>3</sub> , 2% BSA fV, 10 mmol/l glucose, 1:200 ITS-X (51500-056, Life Technologies)                                             |
| Stage 4<br>4 days  | 0.25 mmol/l Ascorbic acid, 2 ng/ml FGF7, 0.25 µmol/l SANT1, 0.1 µmol/l Retinoic Acid, 200 nmol/l LDN, 100 ng/ml EGF, 100 nmol/l TPB and 10 mmol/l Nicotinamide |                                                                                                                                                                                        |
| Stage 5<br>4 days  | 0.25 µmol/l SANT1, 0.05 µmol/l Retinoic acid, 100 nmol/l LDN, 10 µmol/l ALK5inhII, 1 µmol/l GC1, 20 ng/ml Betacellulin and 100 nmol/l GSiXX                    | Basal 3: MCDB131, 2 mmol/l Glutamax, 1.5 g/l NaHCO <sub>3</sub> , 2% BSA fV, 20 mmol/l glucose, 1:200 ITS-X, 10 µg/ml Heparin (H3149, Sigma-Aldrich), 10 µmol/l Zinc Sulfate           |
| Stage 6<br>12 days | 100 nmol/l LDN, 10 µmol/l ALK5inhII, 1 µmol/l GC1, 100 nmol/l GSiXX and 10 µmol/l ROCKi                                                                        |                                                                                                                                                                                        |

**ESM Table 4 Differentiation growth factors and reagents**

| <b>Chemical/Reagent</b>              | <b>Company name</b>        | <b>Catalog#</b> |
|--------------------------------------|----------------------------|-----------------|
| ROCKi Y-27632                        | Selleckchem; Houston, USA  | Cat# S1049      |
| Activin A                            | QKine Ltd; Cambridge, UK   | Cat# Qk001      |
| CHIR                                 | Tocris; Bristol, UK        | Cat# 4423       |
| Ascorbic acid                        | Sigma-Aldrich; USA         | Cat# A4544      |
| FGF7                                 | Genscript; USA             | Cat# Z03047     |
| SANT1                                | Sigma-Aldrich              | Cat# 4572       |
| LDN                                  | Selleckchem                | Cat# S2618      |
| Retinoic acid                        | Sigma-Aldrich              | Cat# R2625      |
| TPB                                  | Santa Cruz; USA            | Cat# sc-204424  |
| EGF                                  | Peprtech; USA              | Cat# AF-100-15  |
| Nicotinamide                         | Sigma-Aldrich              | Cat# N0636      |
| ALK5inhII                            | Selleckchem                | Cat# S7223      |
| GC1                                  | Tocris                     | Cat# 4554       |
| GSiXX                                | Millipore; Burlington, USA | Cat# 56578      |
| N-Acetylcysteine                     | Sigma-Aldrich              | Cat# A9165      |
| Tri-iodothyronine (T3)               | Sigma-Aldrich              | Cat# T6397      |
| Aurora kinase inhibitor ZM447439     | Selleckchem                | Cat# S1103      |
| Glutamax                             | Life Technologies; USA     | Cat# 35050038   |
| Heparin                              | Sigma-Aldrich              | Cat# H3149      |
| Zinc Sulfate                         | Sigma-Aldrich              | Cat# Z0251      |
| Chemically defined lipid concentrate | Invitrogen; USA            | Cat# 11905-031  |
| Medium trace elements A              | Corning; USA               | Cat# 25-021-CI  |
| Medium trace elements B              | Corning                    | Cat# 99-175-CI  |
| Cycloheximide                        | Sigma-Aldrich              | Cat# 01810-1G   |
| Exendin-4                            | Tocris                     | Cat# 1933       |

**ESM Table 5 Antibodies used for immunofluorescence, flow cytometry and immunoblotting**

| <b>Antibody</b>                                                    | <b>Company</b>                    | <b>Catalog#</b>                        | <b>Dilution</b>        |
|--------------------------------------------------------------------|-----------------------------------|----------------------------------------|------------------------|
| Rabbit anti-OCT4 Rabbit                                            | Santa Cruz                        | Cat# sc-9081;<br>RRID: AB_2167703      | 1:250<br>ICC           |
| Rabbit anti-SSEA4 mAb<br>DyLight™ 488                              | Thermo Fisher<br>Scientific; USA  | Cat# MA1-021-D488;<br>RRID: AB_2536688 | 1:100<br>ICC           |
| Mouse anti-TRA 1-60 mAb                                            | Thermo Fisher<br>Scientific       | Cat# MA1-023;<br>RRID: AB_2536699      | 1:100<br>ICC           |
| Goat anti-PDX1                                                     | R&D systems; USA                  | Cat# AF2419;<br>RRID: AB_355257        | 1:500<br>ICC, IHC      |
| Mouse anti-NKX6.1                                                  | DSHB Hybridoma;<br>USA            | Cat# F55A10;<br>RRID: AB_532378        | 1:250<br>ICC, IHC      |
| Sheep anti Human Neurogenin-3                                      | R&D systems                       | Cat# AF3444;<br>RRID: AB_2149527       | 1:250<br>ICC, IHC      |
| Rabbit anti-SOX9                                                   | Sigma-Aldrich                     | Cat# AB5535;<br>RRID: AB_2239761       | 1:500<br>ICC, IHC      |
| Mouse anti-GCG antibody                                            | Sigma-Aldrich                     | Cat# G2654;<br>RRID: AB_259852         | FC-1:160<br>IHC- 1:500 |
| Guinea pig anti-Insulin                                            | Dako; USA                         | Cat# A0564;<br>RRID: AB_10013624       | 1:500<br>ICC, IHC      |
| Rabbit anti-Somatostatin                                           | Dako                              | Cat# A0566;<br>RRID: AB_2688022        | 1:500<br>ICC, IHC      |
| Goat anti-Pancreatic polypeptide                                   | Sigma-Aldrich                     | Cat# SAB2500747;<br>RRID: AB_10611538  | 1:500<br>ICC, IHC      |
| Goat anti-Ghrelin                                                  | Santa Cruz                        | Cat# sc-10368;<br>RRID: AB_2232479     | 1:500<br>ICC, IHC      |
| Mouse anti-CHGA                                                    | Dako                              | Cat# M0869;<br>RRID: AB_2081135        | FC-1:160<br>IHC- 1:500 |
| Rabbit anti-SLC18A1                                                | Sigma-Aldrich                     | Cat# HPA063797;<br>RRID: AB_2685125    | 1:250<br>IHC           |
| Mouse anti-human Mitochondria<br>clone 113-1                       | Sigma-Aldrich                     | Cat# MAB1273;<br>RRID: AB_94052        | 1:150<br>IHC           |
| Mouse Anti-CD184 (CXCR4)<br>Monoclonal Antibody                    | BD Biosciences;<br>USA            | Cat# 555974;<br>RRID: AB_396267        | 1:10<br>FC             |
| Mouse IgG2a, kappa Isotype<br>Control, Phycoerythrin<br>Conjugated | BD Biosciences                    | Cat# 5555749;<br>RRID: AB_396091       | 1:10<br>FC             |
| PE-Mouse anti PDX1                                                 | BD Biosciences                    | Cat# 562161;<br>RRID: AB_10893589      | 1:80<br>FC             |
| Alexa Fluor 647 Mouse anti<br>NKX6-1                               | BD Biosciences                    | Cat# 563338;<br>RRID: AB_2738144       | 1:80<br>FC             |
| Alexa Fluor 647 Mouse IgG1 k<br>isotype control                    | BD Biosciences                    | Cat# 557714;<br>RRID: AB_396823        | 1:80<br>FC             |
| Alexa Fluor 647 Rabbit anti<br>Insulin (C27C9)                     | Cell Signaling<br>Technology; USA | Cat# 9008;<br>RRID: AB_2687822         | 1:80<br>FC             |
| Alexa Fluor 647 Rabbit IgG<br>Isotype Control                      | Cell Signaling<br>Technology      | Cat# 3452S;<br>RRID: AB_10695811       | 1:80<br>FC             |

|                                                             |                           |                                           |              |
|-------------------------------------------------------------|---------------------------|-------------------------------------------|--------------|
| Alexa Fluor 488 Donkey anti-Mouse IgG secondary antibody    | Thermo Fisher Scientific  | Cat# A-21202;<br>RRID: AB_141607          | 1:500        |
| Alexa Fluor 594 Goat anti-Guinea Pig IgG secondary antibody | Thermo Fisher Scientific  | Cat# A-11076;<br>RRID: AB_2534120         | 1:500        |
| Alexa Fluor 594 Donkey anti-Sheep IgG secondary antibody    | Thermo Fisher Scientific  | Cat# A-11016;<br>RRID: AB_2534083         | 1:500        |
| Alexa Fluor 488 Donkey anti-Rabbit IgG secondary antibody   | Thermo Fisher Scientific  | Cat# A-21206;<br>RRID: AB_2535792         | 1:500        |
| Alexa Fluor 488 Donkey anti-Mouse IgG secondary antibody    | Thermo Fisher Scientific  | Cat# A-21203;<br>RRID: AB_141633          | 1:500        |
| Alexa Fluor 488 Donkey anti-Goat IgG secondary antibody     | Thermo Fisher Scientific  | Cat# A-11055;<br>RRID: AB_2534102         | 1:500        |
| Mouse anti-alpha-Tubulin Mouse mAb                          | Sigma-Aldrich             | Cat# T5168; (B-5-1-2);<br>RRID: AB_477579 | 1:2000<br>WB |
| Mouse anti-β-actin-HRP mAb                                  | Santa Cruz                | Cat# sc-47778; (C4);<br>RRID: AB_626632   | 1:1000<br>WB |
| Rabbit anti-RFX6                                            | Sigma-Aldrich             | Cat# HPA037696;<br>RRID: AB_2675616       | 1:100<br>WB  |
| Anti-rabbit IgG, HRP-linked Antibody                        | Cell Signaling Technology | Cat# 7074;<br>RRID: AB_2099233            | 1:2000<br>WB |
| Anti-mouse IgG, HRP-linked Antibody                         | Cell Signaling Technology | Cat# 7076;<br>RRID: AB_330924             | 1:5000<br>WB |



**ESM Table 6 Primers for quantitative RT-PCR**

| <b>Primer</b>                                | <b>NCBI Reference</b> | <b>Sequence and amplicon size</b>                             |
|----------------------------------------------|-----------------------|---------------------------------------------------------------|
| <i>PPIG</i> primer pair<br>Housekeeping gene | NM_004792             | Fw: TCTTGTCAATGGCCAACAGAG<br>Rv: GCCCATCTAAATGAGGAGTTG; 84 bp |
| <i>OCT4</i> primer pair                      | NM_002701             | Fw: TTGGGCTCGAGAAGGATGTG<br>Rv: TCCTCTCGTTGTGCATAGTCG; 91 bp  |
| <i>SOX2</i> primer pair                      | NM_003106             | Fw: GCCCTGCAGTACAACCTCCAT<br>Rv: TGCCCTGCTGCGAGTAGGA; 85 bp   |
| <i>NANOG</i> primer pair                     | NM_024865.2           | Fw: CTCAGCCTCCAGCAGATGC<br>Rv: TAGATTTTATTCTCTGGTTCTGG; 94 bp |
| <i>RFX6</i> primer pair                      | NM_173560.1           | Fw: GCATGTCGAACTCCAGTCCT<br>Rv: GGAGTCCAGGGTTTCTTGAG; 114 bp  |
| <i>PDX1</i> primer pair                      | NM_000209.3           | Fw: AAGTCTACCAAAGCTCACGCG<br>Rv: CGTAGGCGCCGCCTGC; 52 bp      |
| <i>SOX9</i> primer pair                      | NM_000346             | Fw: ATCAAGACGGAGCAGCTGAG<br>Rv: GGCTGTAGTGTGGGAGGTTG; 100 bp  |
| <i>NEUROG3</i> primer pair                   | NM_020999             | Fw: GACGACGCGAAGCTCACCAA<br>Rv: TACAAGCTGTGGTCCGCTAT; 98 bp   |
| <i>INS</i> primer pair                       | NM_000207             | Fw: CAGAAGCGTGGCATTGTGGA<br>Rv: GCTGCGTCTAGTTGCAGTAG; 82 bp   |
| <i>GCG</i> primer pair                       | NM_002054             | Fw: GAAGGCGAGATTTCCAGAAG<br>Rv: CCTGGCGGCAAGATTATCAAG; 113 bp |
| <i>GHRL</i> primer pair                      | NM_016362             | Fw: TGAACACCAGAGAGTCCAGCA<br>Rv: GCTTGGCTGGTGGCTTCTT; 53 bp   |
| <i>PPY</i> primer pair                       | NM_002722             | Fw: ATGCCACACCAGAGCAGATG<br>Rv: CAGCGTGTCTCTTTGTGTC; 104 bp   |
| <i>SST</i> primer pair                       | NM_001048             | Fw: CCCAGACTCCGTCAGTTTCT<br>Rv: ACAGCAGCTCTGCCAAGAAG; 88 bp   |

ESM Fig. 1

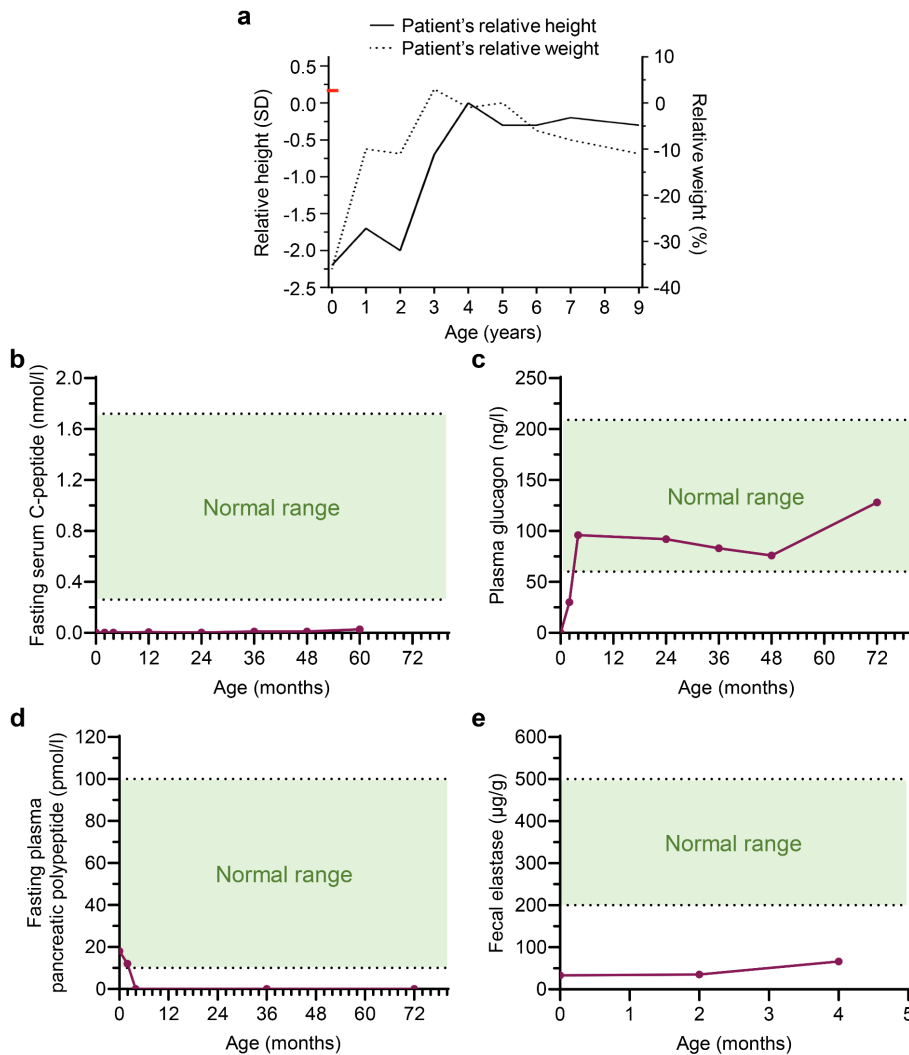

**ESM Fig. 1 Clinical manifestations of the homozygous *RFX6* patient.**

(a) Growth chart showing the patient's relative height and weight. Patient was born at gestation week 38+1, height; 47 cm and weight; 1800 g. Parental target relative height (+0.3 SD; red mark on left y axis). Relative height is depicted with solid line (left y axis) and relative weight (i.e. weight-for-height) with dotted line (right y axis).

(b) Fasting serum c-peptide levels in nmol/l during the first 5 years of age (normal range 0.26–1.72 nmol/l). Normal range in green represents clinical laboratory reference values.

(c) Plasma glucagon levels in ng/l during the first 6 years of age (normal range 60–209 ng/l).

(d) Fasting plasma pancreatic polypeptide levels in pmol/l during the first 6 years of age (normal range 10–100 pmol/l). Normal range in green represents clinical laboratory reference values.

(e) Fecal elastase levels in  $\mu\text{g/g}$  for the first 4 months after birth (normal level  $>200 \mu\text{g/g}$ ). Normal range in green represents clinical laboratory reference values.

# ESM Fig. 2

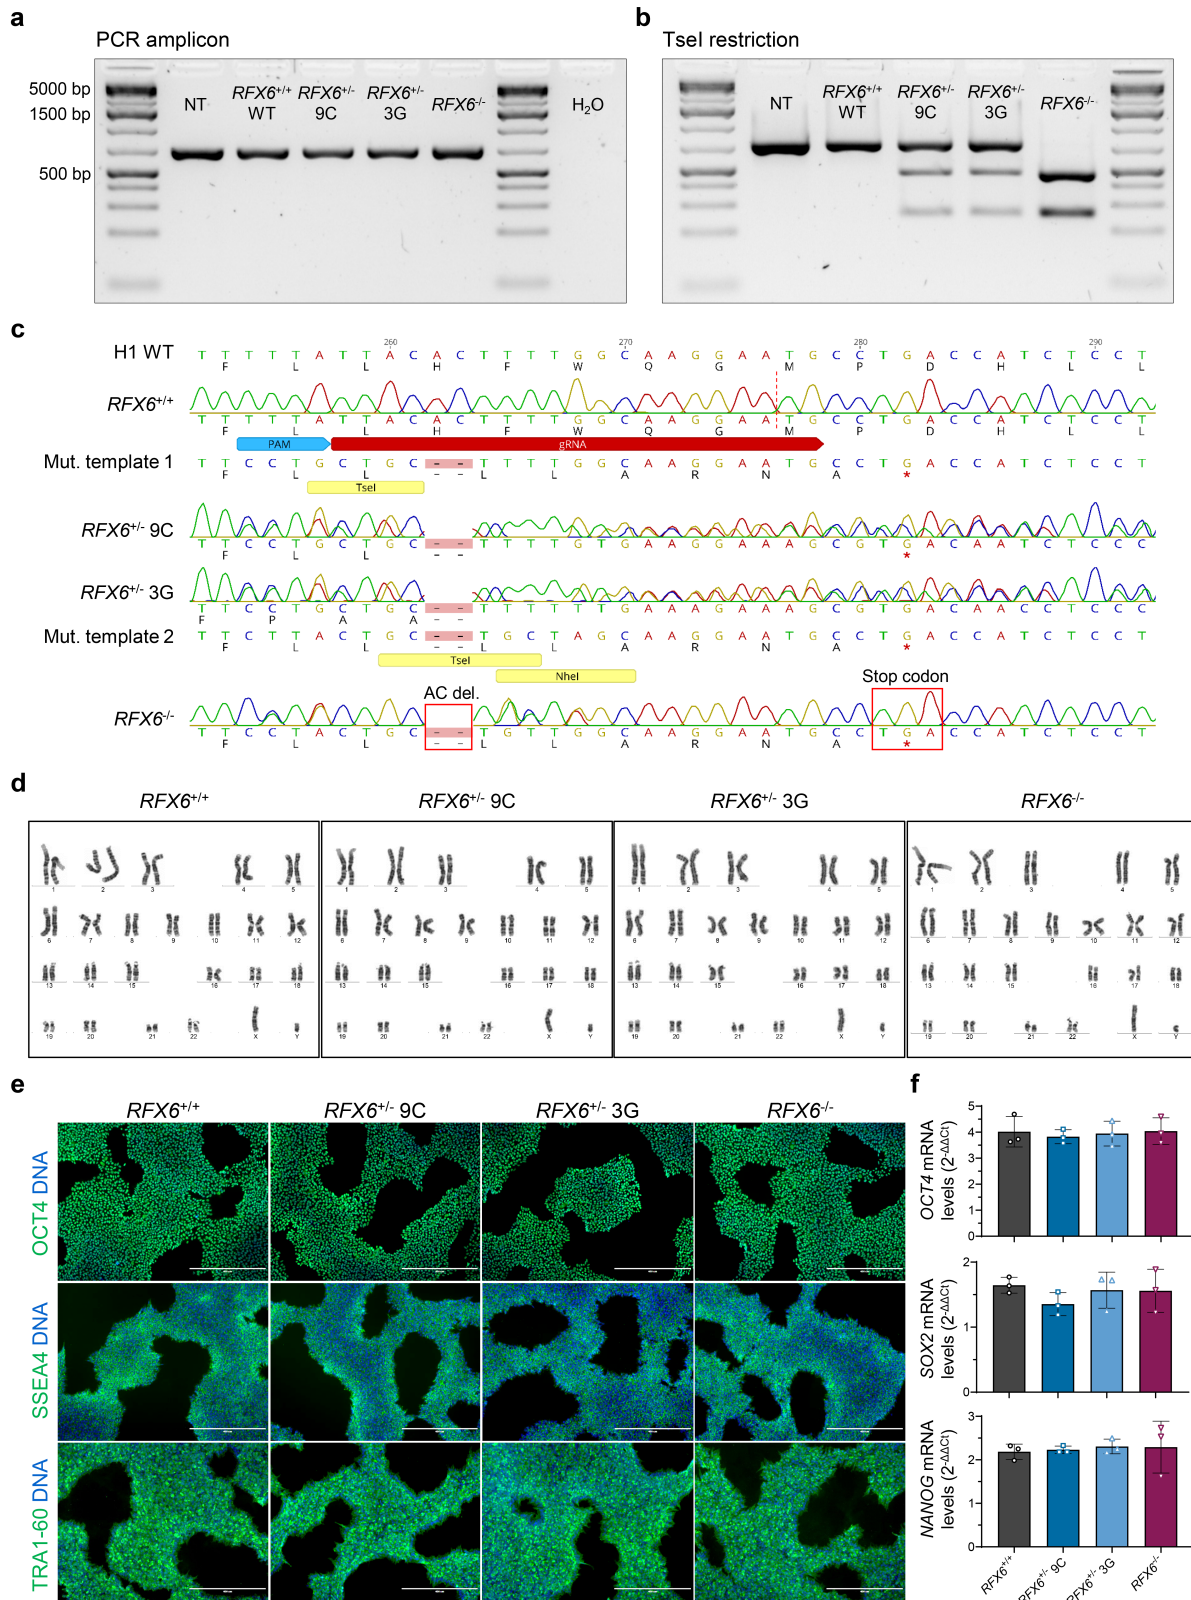

**ESM Fig. 2 *RFX6* patient frameshift variant introduction in H1 hESCs using CRISPR-Cpf1.**

(a) PCR gel electrophoresis showing 729 bp amplicons in all the cell-lines.

(b) PCR gel electrophoresis of the TseI restricted amplicons showing the restricted bands of the edited alleles 264+465 bp in heterozygous and homozygous cell-lines.

(c) Sanger sequencing showing the variant introduction heterozygously and homozygously using CRISPR-Cpf1 gRNAs and mutation templates.

(d) Normal karyotype visualised with G-banding for the four generated clones.

(e) Immunocytochemistry for pluripotency factors OCT4, TRA 1-60 and SSEA4 for the four clones. Scale bar, 400  $\mu$ m.

(f) Relative gene expression levels of pluripotency factors *OCT4*, *SOX2* and *NANOG* for the four clones ( $n=3$ ).

Statistical significance was measured using one-way ANOVA with Tukey's test for multiple comparisons correction in (f). Data are presented as means  $\pm$  SD.

ESM Fig. 3

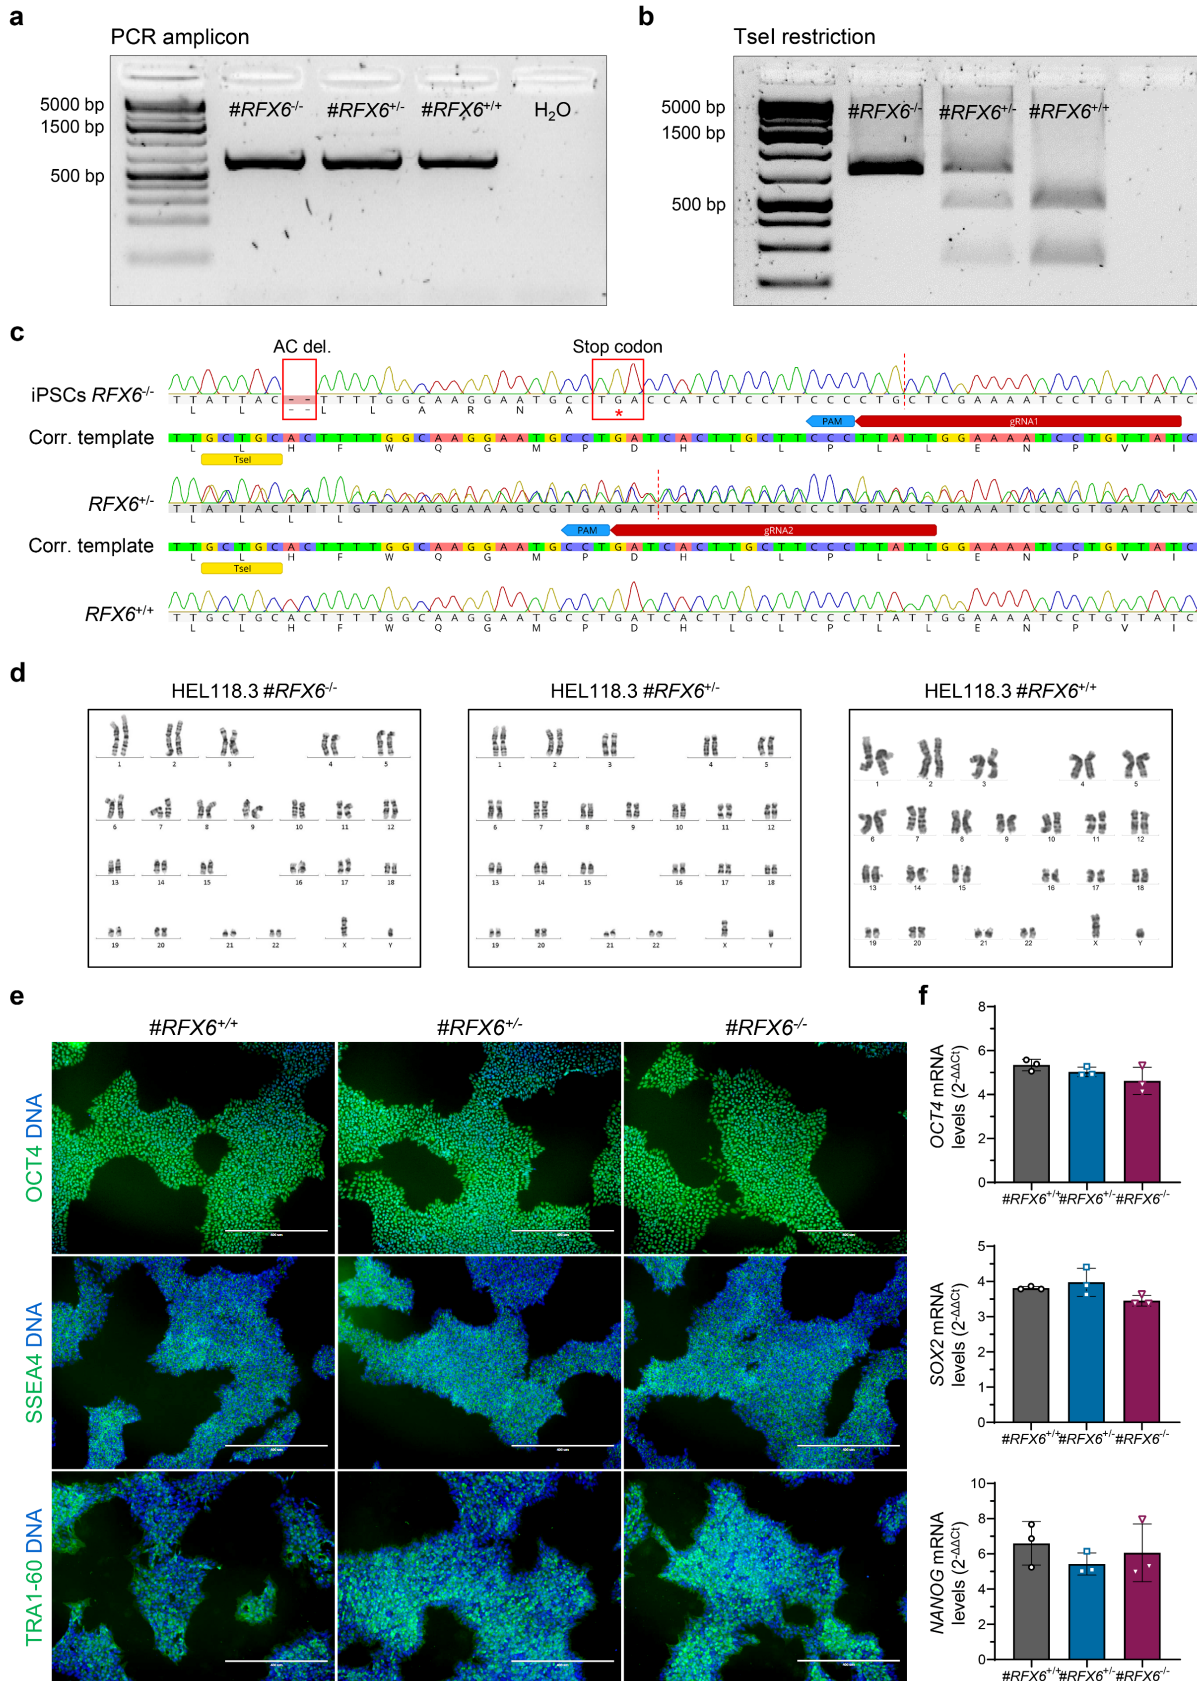

**ESM Fig. 3 *RFX6* frameshift variant correction in patient derived iPSCs using CRISPR-Cas9.**

- (a) PCR gel electrophoresis showing 729 bp amplicons of *RFX6* in all the cell-lines.
  - (b) PCR gel electrophoresis of the TseI restricted amplicons showing the restricted bands of the corrected alleles 264+465 bp in heterozygous and homozygous corrected cell-lines.
  - (c) Sanger sequencing showing the variant correction of the patient derived iPSCs using CRISPR-Cas9 gRNAs and a correction template.
  - (d) Normal karyotype visualised with G-banding for the three clones.
  - (e) Immunocytochemistry for pluripotency factors OCT4, TRA 1-60 and SSEA4 for the three clones. Scale bar, 400  $\mu$ m.
  - (f) Relative gene expression levels of pluripotency factors *OCT4*, *SOX2* and *NANOG* for the three clones ( $n=3$ ).
- Statistical significance was measured using one-way ANOVA with Tukey's test for multiple comparisons correction in (f). Data are presented as means  $\pm$  SD.

ESM Fig. 4

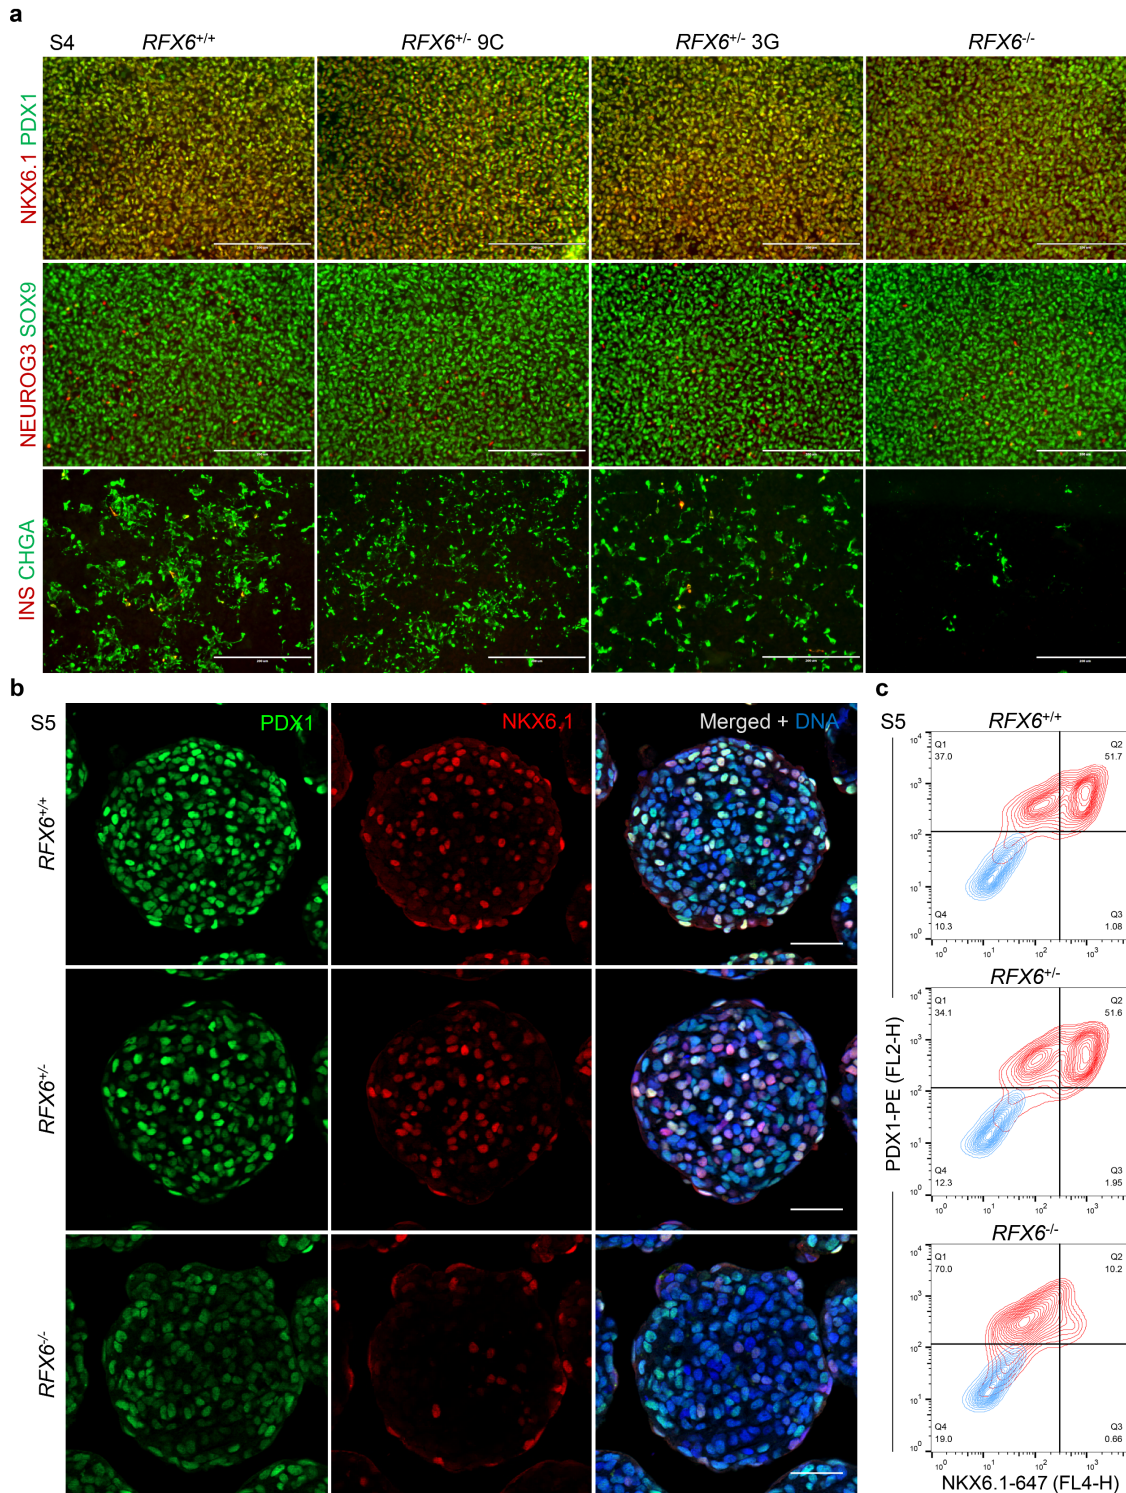

**ESM Fig. 4 Reduced NKX6.1<sup>+</sup> cells at the endocrine precursor stage in *RFX6*<sup>-/-</sup>.**

(a) Immunocytochemistry showing PDX1<sup>+</sup> NKX6.1<sup>+</sup>, SOX9<sup>+</sup> NEUROG3<sup>+</sup> and CHGA<sup>+</sup> INS<sup>+</sup> cells at S4. Scale bar, 200  $\mu$ m.

(b) Immunohistochemistry showing PDX1<sup>+</sup> and NKX6.1<sup>+</sup> cells at S5. Scale bar, 50  $\mu$ m.

(c) Flow cytometry analysis for PDX1<sup>+</sup> and NKX6.1<sup>+</sup> cells at S5. PDX1 and NKX6.1 sample is shown in red and IgG isotype negative control is shown in blue.

ESM Fig. 5

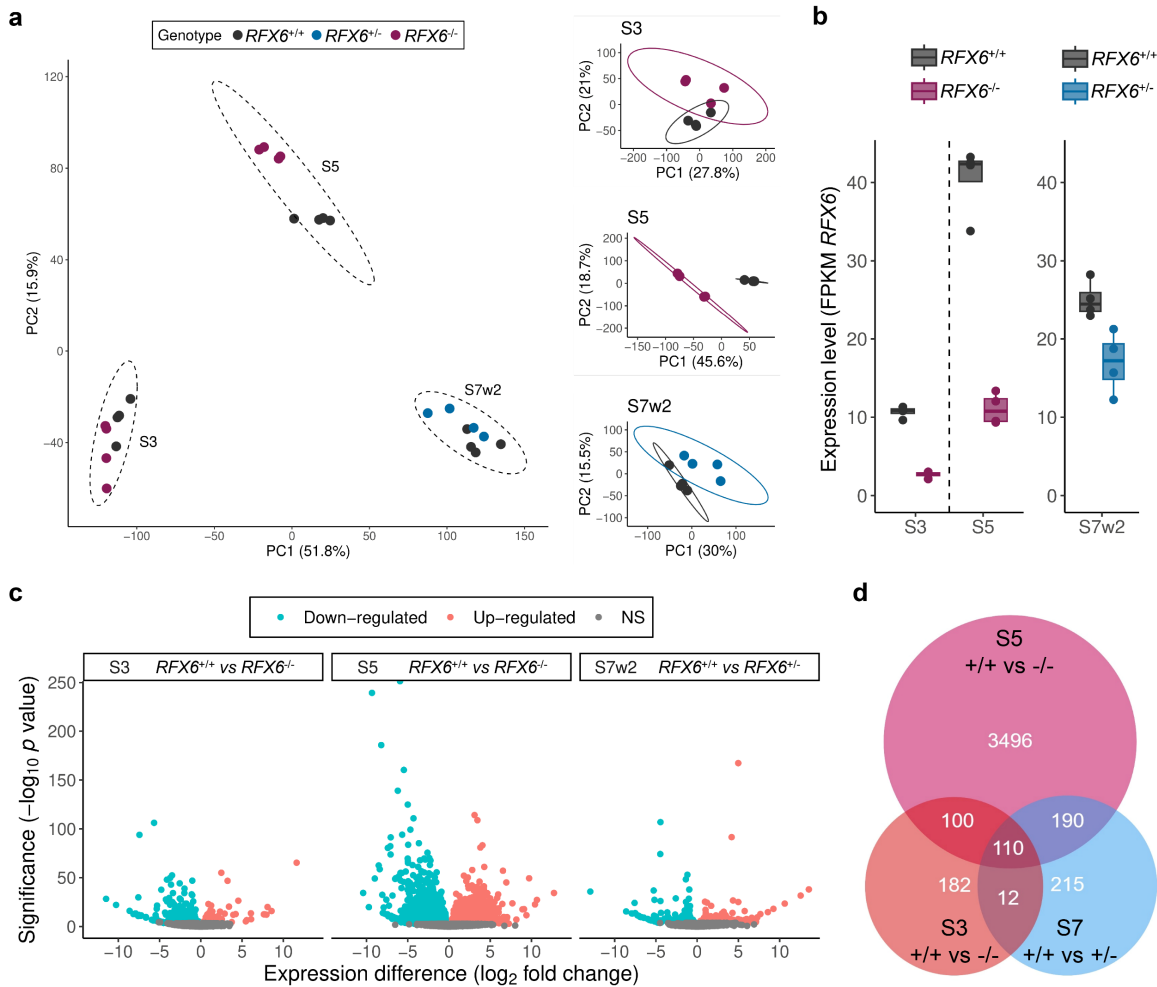

ESM Fig. 5 RNA-seq analysis of H1 *RFX6* differentiated cells.

(a) Principal component analysis (PCA) of the RNA-seq data (using normalised read counts). The principal components that account for the majority of variation, separate the samples by developmental stage. The sub-plots show a PCA separately for each stage highlighting the differences between the genotypes; *RFX6*<sup>+/+</sup> vs *RFX6*<sup>-/-</sup> at S3 and S5, and *RFX6*<sup>+/+</sup> vs *RFX6*<sup>+/-</sup> at stage 7 week 2 (S7w2) ( $n=4$ ).

(b) Boxplot of *RFX6* expression levels (FPKM) at different developmental stages for the tested genotypes ( $n=4$ ).

(c) Volcano plots for differentially expressed genes for *RFX6*<sup>+/+</sup> vs *RFX6*<sup>-/-</sup> at S3 and S5, and for *RFX6*<sup>+/+</sup> vs *RFX6*<sup>+/-</sup> at S7w2. Significantly downregulated genes, iris blue; upregulated genes, soft red.

(d) Venn diagram showing the number and overlap of differentially expressed genes (FDR < 0.01) between the genotypes within each developmental stage.



ESM Fig. 6

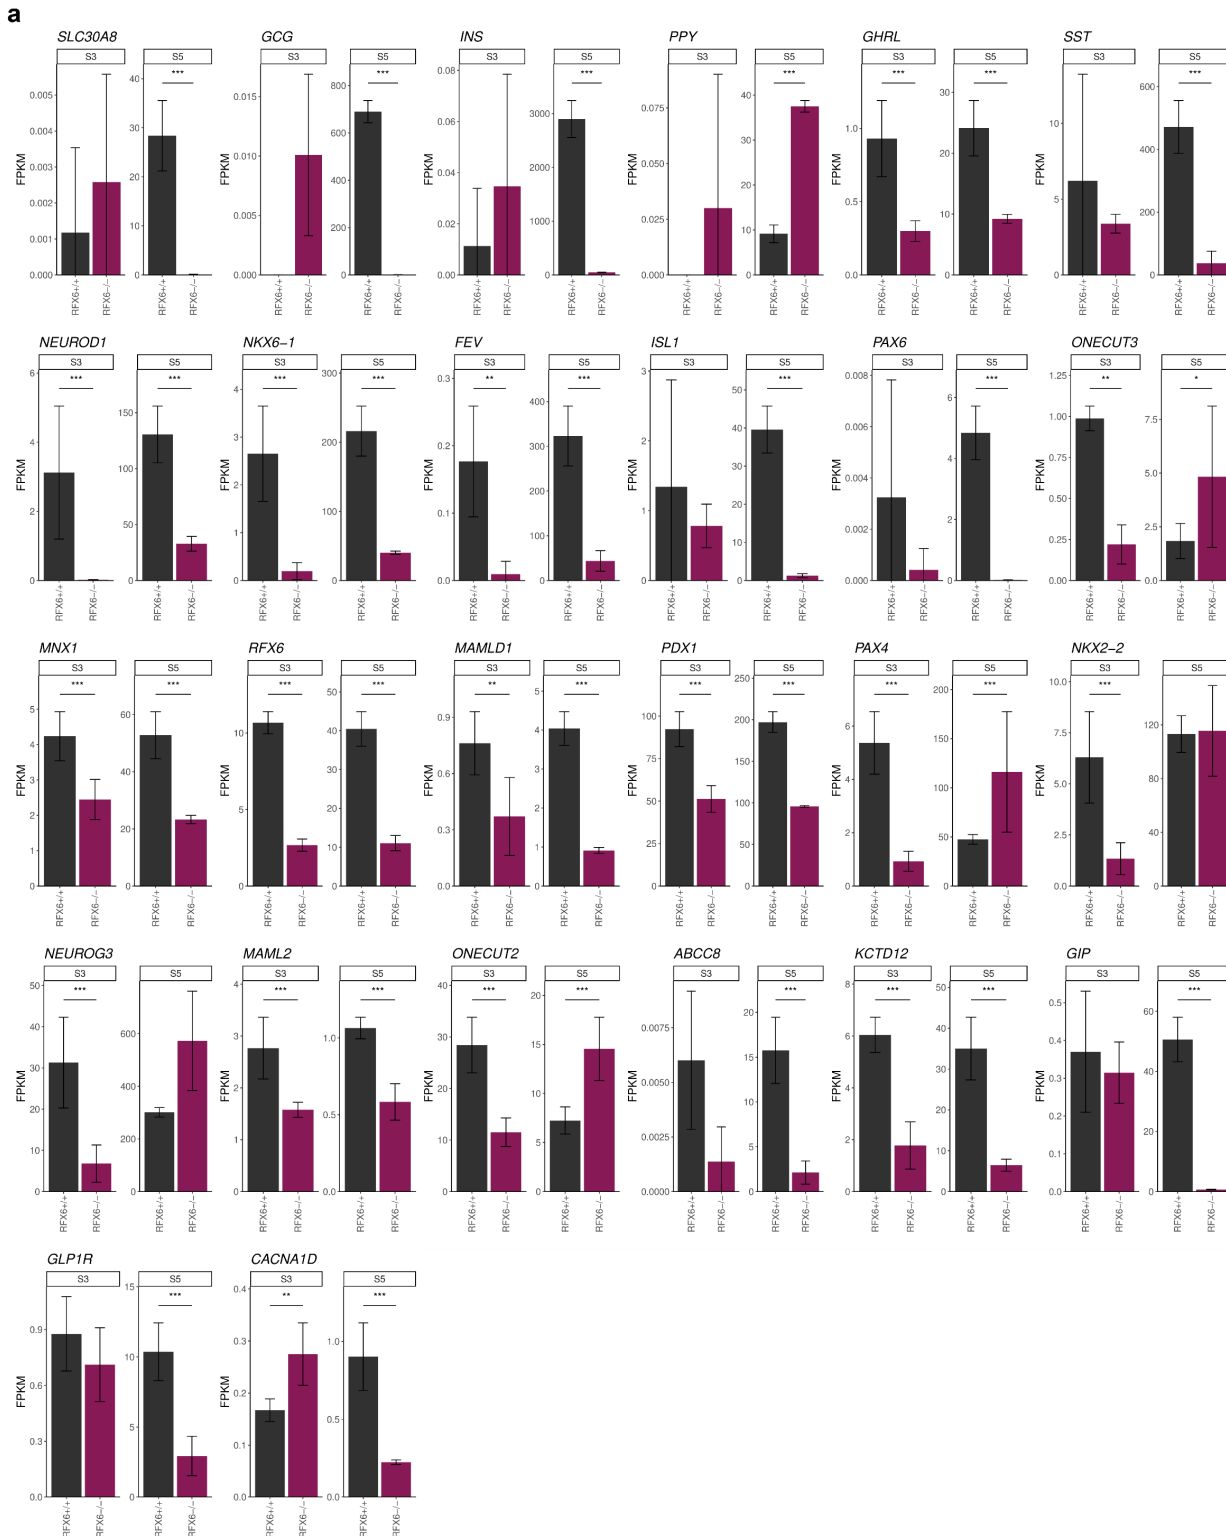

**ESM Fig. 6 Reduced gene expression levels of pancreatic markers in *RFX6*<sup>-/-</sup>.**

(a) Barplots of average gene expression (FPKM) of the heatmap in (Fig. 2g). Statistical significance is indicated as False Discovery Rate corrected *p* value, \*FDR<0.05, \*\*FDR<0.01, \*\*\*FDR<0.001. Data are presented as means ± SD.

ESM Fig. 7

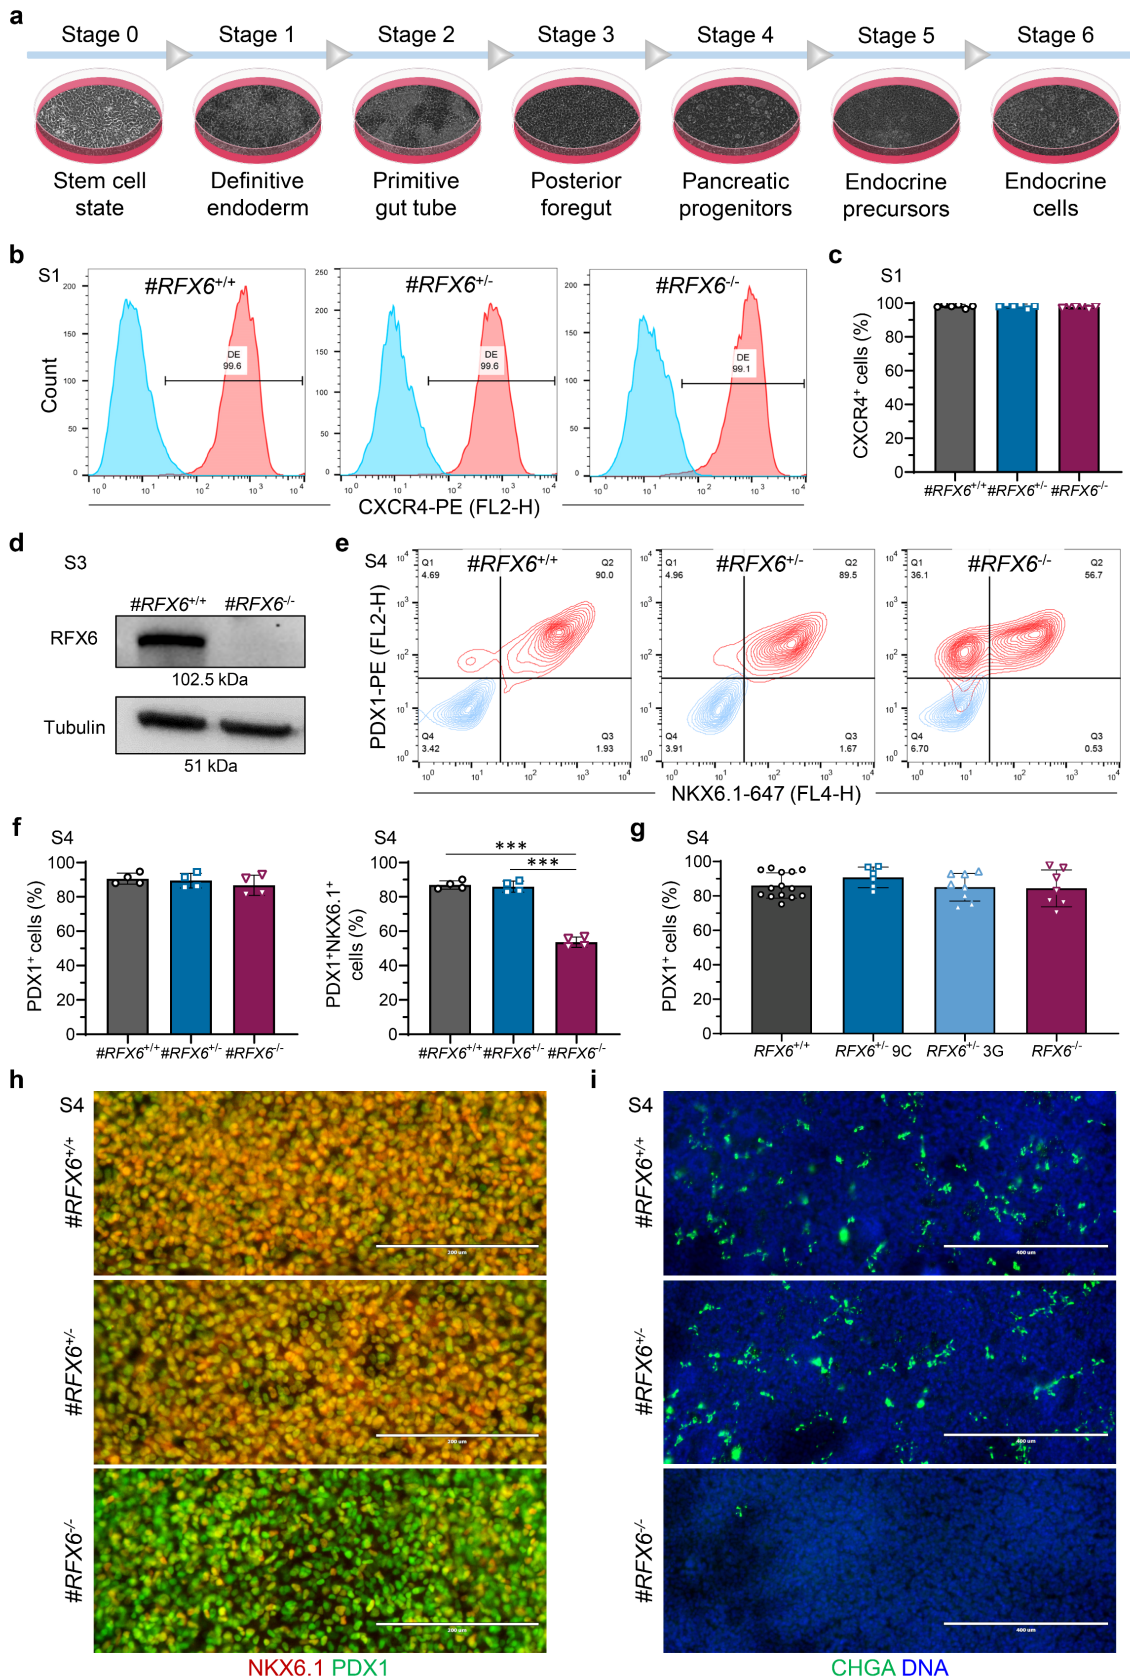

**ESM Fig. 7 Reduced numbers of pancreatic progenitor cells in patient-derived iPSCs.**

- (a) Schematic of pancreatic endocrine differentiation protocol for 6 stages in monolayer.
  - (b) Flow cytometry analysis for the expression of C-X-C motif chemokine receptor 4-positive (CXCR4<sup>+</sup>) definitive endoderm cells at the end of S1. CXCR4 sample is shown in red and IgG isotype negative control is shown in blue.
  - (c) Quantification of (b) ( $n=6$ ).
  - (d) Immunoblot for RFX6 and  $\alpha$ -Tubulin at S3 of control HEL46.11 (#RFX6<sup>+/+</sup>) compared to the patient cell-line (#RFX6<sup>-/-</sup>).
  - (e) Flow cytometry analysis for PDX1<sup>+</sup> and NKX6.1<sup>+</sup> cells in the iPSC-lines at S4. PDX1 and NKX6.1 sample is shown in red and IgG isotype negative control is shown in blue.
  - (f) Quantification of (e) ( $n=4$ ).
  - (g) Flow cytometry quantification for PDX1<sup>+</sup> cells in the hESC-lines at S4 ( $n=7-14$ )
  - (h) Immunocytochemistry for PDX1<sup>+</sup> and NKX6.1<sup>+</sup> at the end of S4. Scale bar, 200  $\mu$ m.
  - (i) Immunocytochemistry for CHGA<sup>+</sup> at the end of S4. Scale bar, 400  $\mu$ m.
- Statistical significance was measured using one-way ANOVA with Tukey's test for multiple comparisons correction in (c, f and g). Data are presented as means  $\pm$  SD, \*\*\* $p<0.001$ .

## ESM Fig. 8

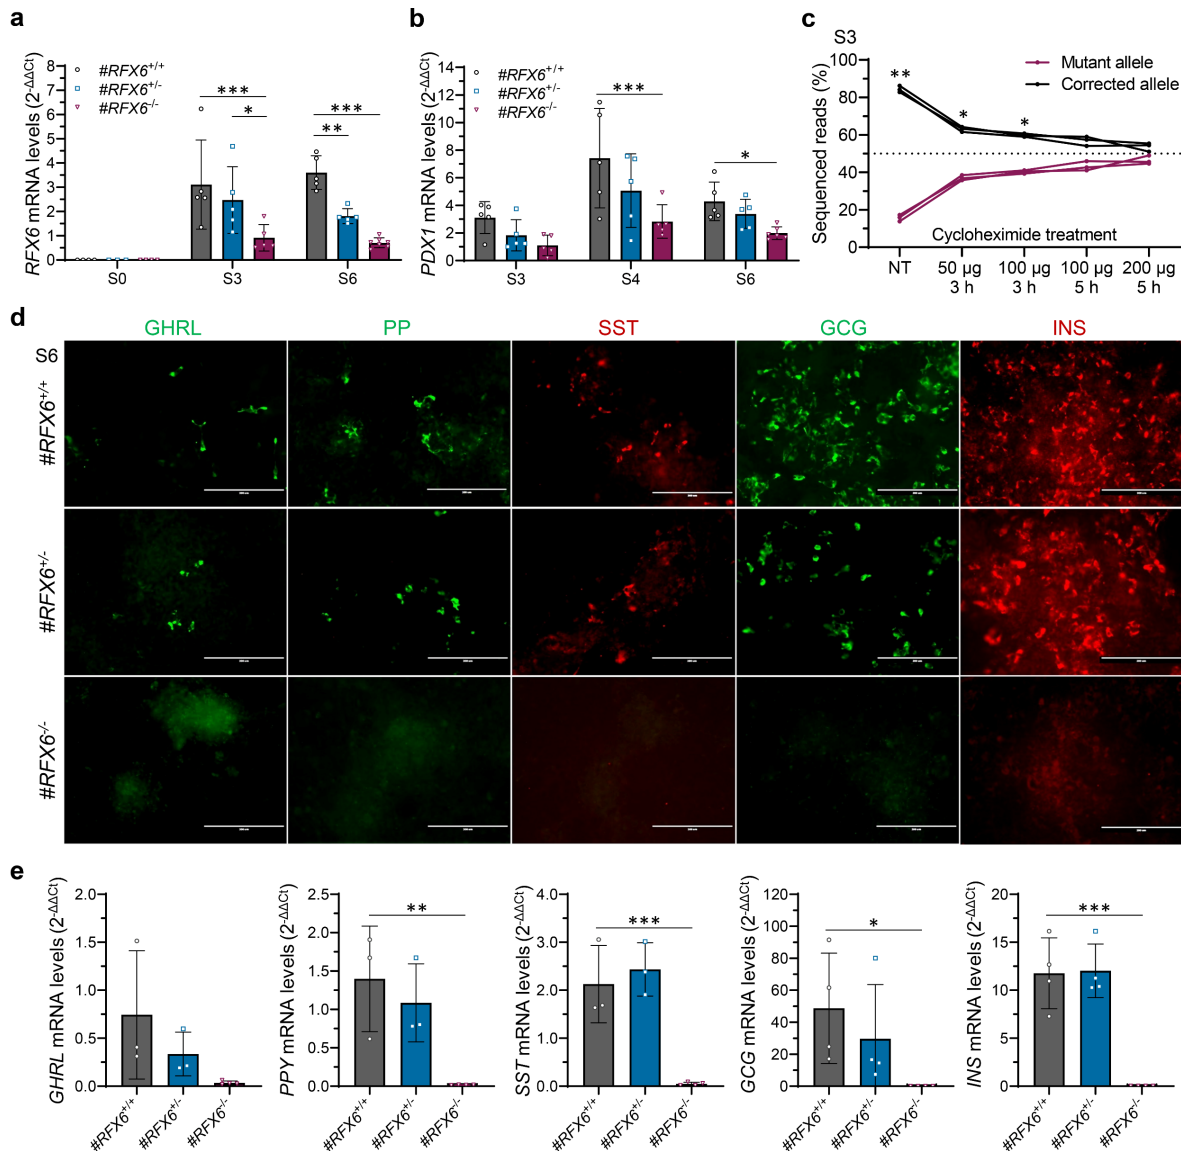

### ESM Fig. 8 *RFX6* frameshift variant nonsense-mediated mRNA decay and diminished production of pancreatic endocrine cells from patient-derived iPSCs.

(a) Relative gene expression levels of *RFX6* at S0, S3 and S6 ( $n=3-7$ ).  
 (b) Relative gene expression levels of *PDX1* at S3, S4 and S6 ( $n=5-6$ ).  
 (c) Percentage of *RFX6* cDNA reads of the variant and corrected alleles at S3 of #*RFX6*<sup>+/-</sup> cell-line treated with different doses of the NMD inhibitor cycloheximide ( $n=3$ ).  
 (d) Immunocytochemistry at S6 for the five pancreatic endocrine cell types. Ghrelin (GHRL), pancreatic polypeptide (PP), somatostatin (SST), glucagon (GCG) and insulin (INS). Scale bar, 200 µm.

(e) Relative gene expression levels of the five pancreatic hormones *GHRL*, *PPY*, *SST*, *GCG* and *INS* for the three isogenic cell-lines at S6 ( $n=3-4$ ).

Statistical significance was measured using two-way ANOVA with Tukey's test for multiple comparisons correction in (a and b), using paired parametric multiple t-tests in (c), and using one-way ANOVA with Tukey's test for multiple comparisons correction in (e). Data are presented as means  $\pm$  SD, \* $p<0.05$ , \*\* $p<0.01$ , \*\*\* $p<0.001$ .

ESM Fig. 9

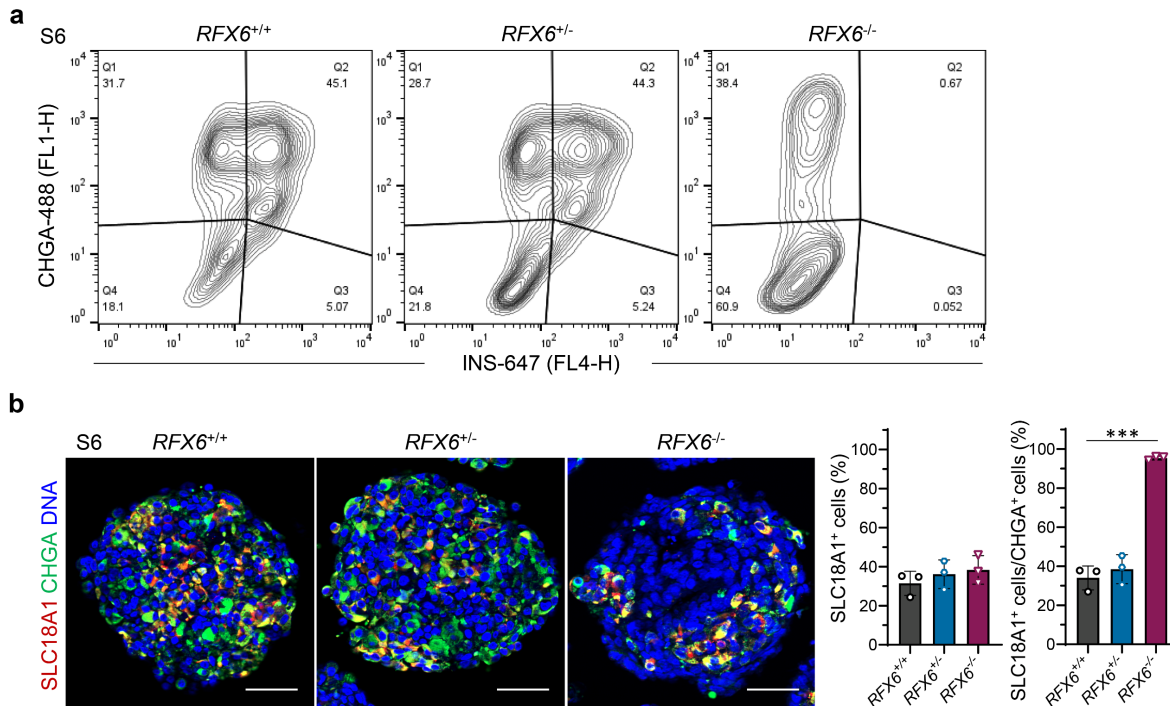

**ESM Fig. 9 Reduced CHGA<sup>+</sup> endocrine cells in *RFX6*<sup>-/-</sup> at S6.**

**(a)** Flow cytometry analysis for CHGA<sup>+</sup> cells (y-axis) and INS<sup>+</sup> cells (x-axis) at S6.

**(b)** Immunohistochemistry showing CHGA<sup>+</sup> (green) and SLC18A1<sup>+</sup> (red) cells in SC-islets at S6 (scale bar, 50 μm) and quantification of SLC18A1<sup>+</sup> cells per total cells and per CHGA<sup>+</sup> cells (*n*=3). Statistical significance was measured using one-way ANOVA with Tukey's test for multiple comparisons correction. Data are presented as means ± SD, \*\*\**p*<0.001.

ESM Fig. 10

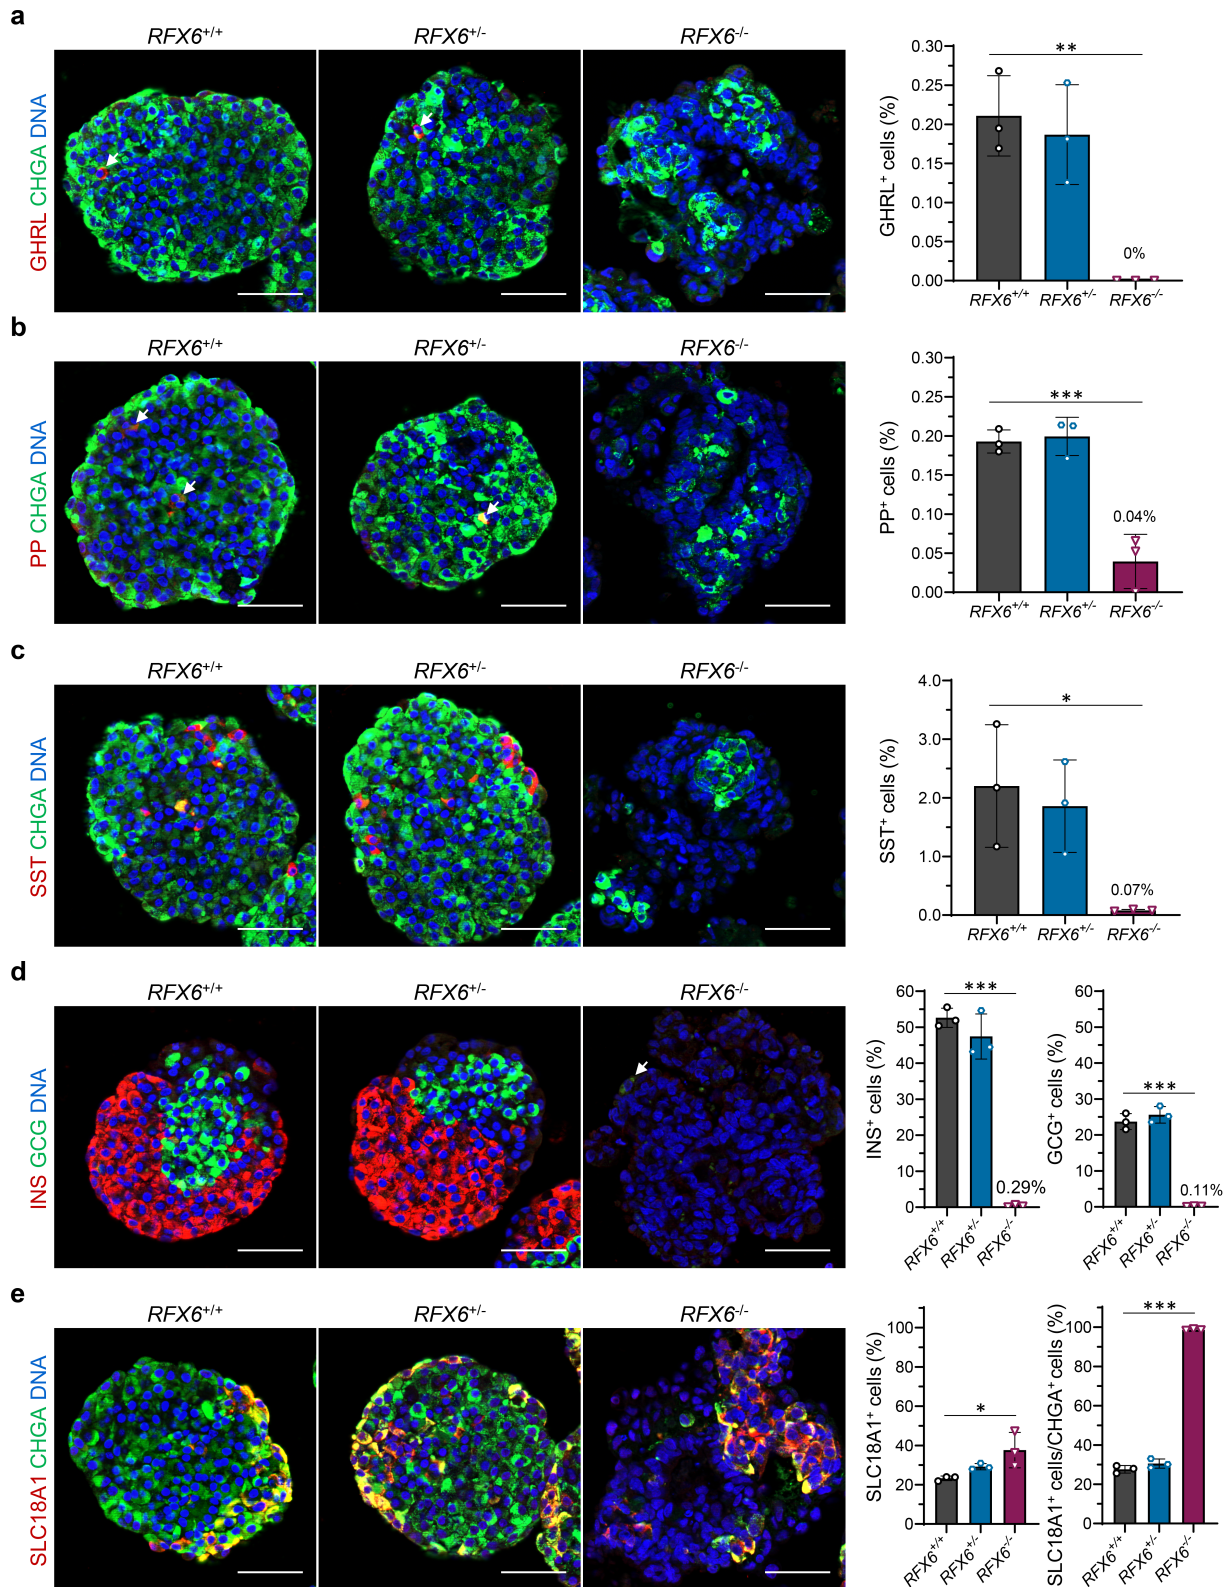

**ESM Fig. 10 Scarce pancreatic endocrine cells in *RFX6*<sup>-/-</sup>.**

(a) Immunohistochemistry showing CHGA<sup>+</sup> (green) and GHRL<sup>+</sup> (red with white arrows) cells in SC-islets at stage 7 week 2 (S7w2) for *RFX6*<sup>+/+</sup> and *RFX6*<sup>+/-</sup>, and at stage 7 day 2 (S7d2) for *RFX6*<sup>-/-</sup> (scale bar, 50 μm), and quantification of GHRL<sup>+</sup> cells (*n*=3).

(b) Immunohistochemistry showing CHGA<sup>+</sup> (green) and PP<sup>+</sup> (red with white arrows) cells in SC-islets at S7w2 for *RFX6*<sup>+/+</sup> and *RFX6*<sup>+/-</sup>, and at S7d2 for *RFX6*<sup>-/-</sup> (scale bar, 50 μm), and quantification of PP<sup>+</sup> cells (*n*=3).

(c) Immunohistochemistry showing CHGA<sup>+</sup> (green) and SST<sup>+</sup> (red) cells in SC-islets at S7w2 for *RFX6*<sup>+/+</sup> and *RFX6*<sup>+/-</sup>, and at S7d2 for *RFX6*<sup>-/-</sup> (scale bar, 50 μm), and quantification of SST<sup>+</sup> cells (*n*=3).

(d) Immunohistochemistry showing GCG<sup>+</sup> (green) and INS<sup>+</sup> (red) cells in SC-islets at S7w2 for *RFX6*<sup>+/+</sup> and *RFX6*<sup>+/-</sup>, and at S7d2 for *RFX6*<sup>-/-</sup> (white arrow points at a GCG<sup>+</sup> cell) (scale bar, 50 μm), and their quantification (*n*=3).

(e) Immunohistochemistry showing CHGA<sup>+</sup> (green) and SLC18A1<sup>+</sup> (red) cells in SC-islets at S7w2 for *RFX6*<sup>+/+</sup> and *RFX6*<sup>+/-</sup>, and at S7d2 for *RFX6*<sup>-/-</sup> (scale bar, 50 μm), and quantification of SLC18A1<sup>+</sup> cells per total cells and per CHGA<sup>+</sup> cells (*n*=3).

Statistical significance in (a–e) was measured using one-way ANOVA with Tukey's test for multiple comparisons correction. Data are presented as means ± SD, \**p*<0.05, \*\**p*<0.01, \*\*\**p*<0.001.

ESM Fig. 11

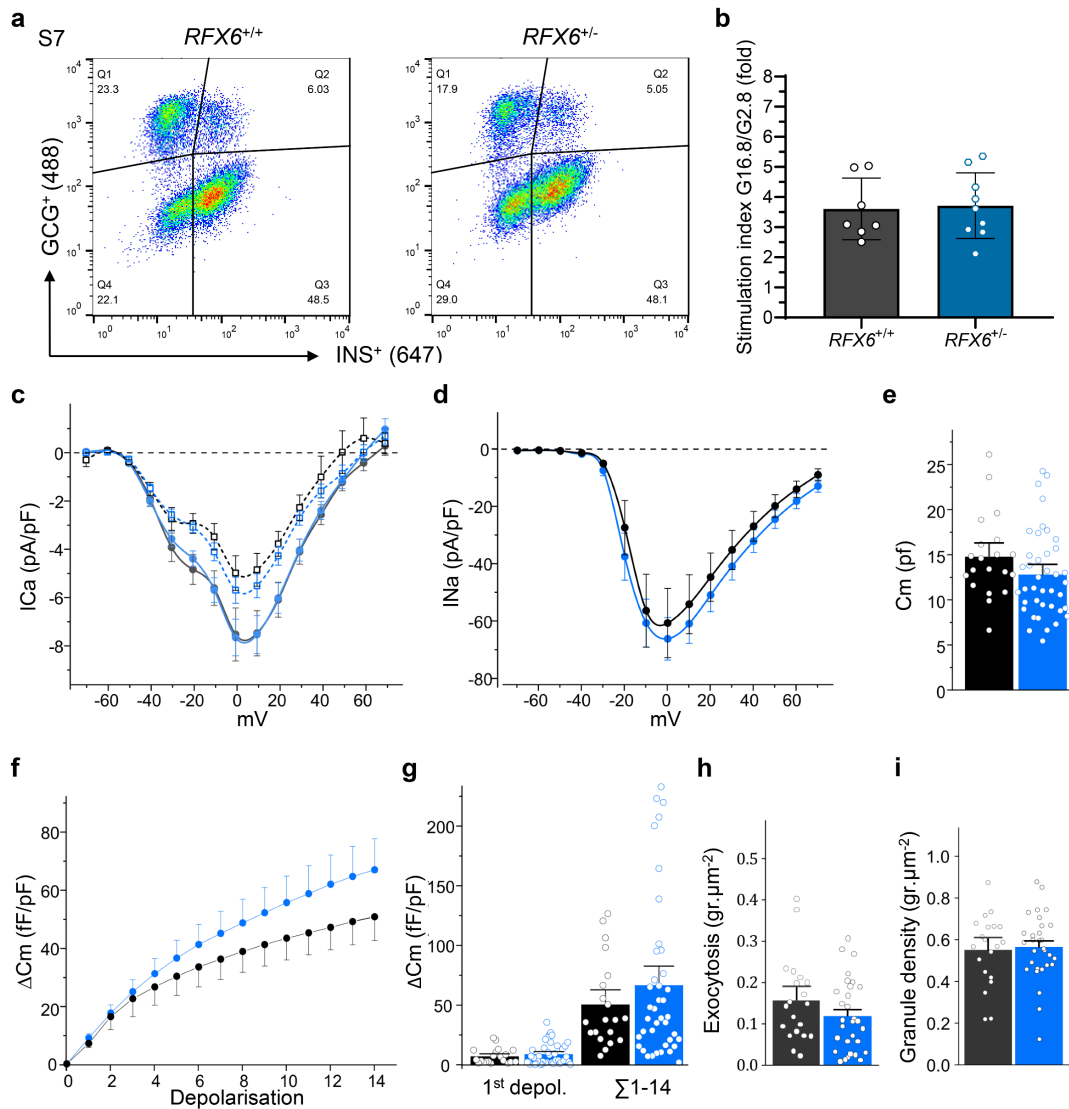

**ESM Fig. 11 Voltage-dependence and exocytosis of *RFX6* SC-islets.**

(a) Flow cytometry analysis for GCG<sup>+</sup> cells (y-axis) and INS<sup>+</sup> cells (x-axis) at stage 7 week 2 (S7w2).

(b) Insulin secretion stimulation index from static GSIS assays (G16.8 mmol/l / G2.8 mmol/l) ( $n=7-9$ ).

(c) Voltage-dependence of Ca<sup>2+</sup>-currents in *RFX6*<sup>+/+</sup> (black,  $n=20$  cells) and *RFX6*<sup>+/-</sup> (blue,  $n=37$  cells) beta cells, in absence (solid lines) or presence of 20  $\mu$ M nifedipine.

(d) Voltage-dependence of Na<sup>+</sup>-currents in the same cells as in (c).

(e) Initial whole cell capacitance, as measure of cell size.

(f) Exocytosis stimulated by a train of voltage-clamp depolarisations, measured as capacitance increase in *RFX6*<sup>+/+</sup> (black) and *RFX6*<sup>+/-</sup> (blue,  $n=40$  cells) beta cells.

(g) Quantification of capacitance changes in F during the first (left) and the sum of all depolarisations.

(h-i) Exocytosis (h) and initial docked granules (i) measured by TIRF microscopy of NPY-EGFP labelled insulin granules in *RFX6*<sup>+/+</sup> (black,  $n=20$  cells) and *RFX6*<sup>+/-</sup> (blue,  $n=30$  cells) beta cells. Cells were stimulated by elevating K<sup>+</sup> for 40s; data are normalised to cell footprint area.



# ESM Fig. 12

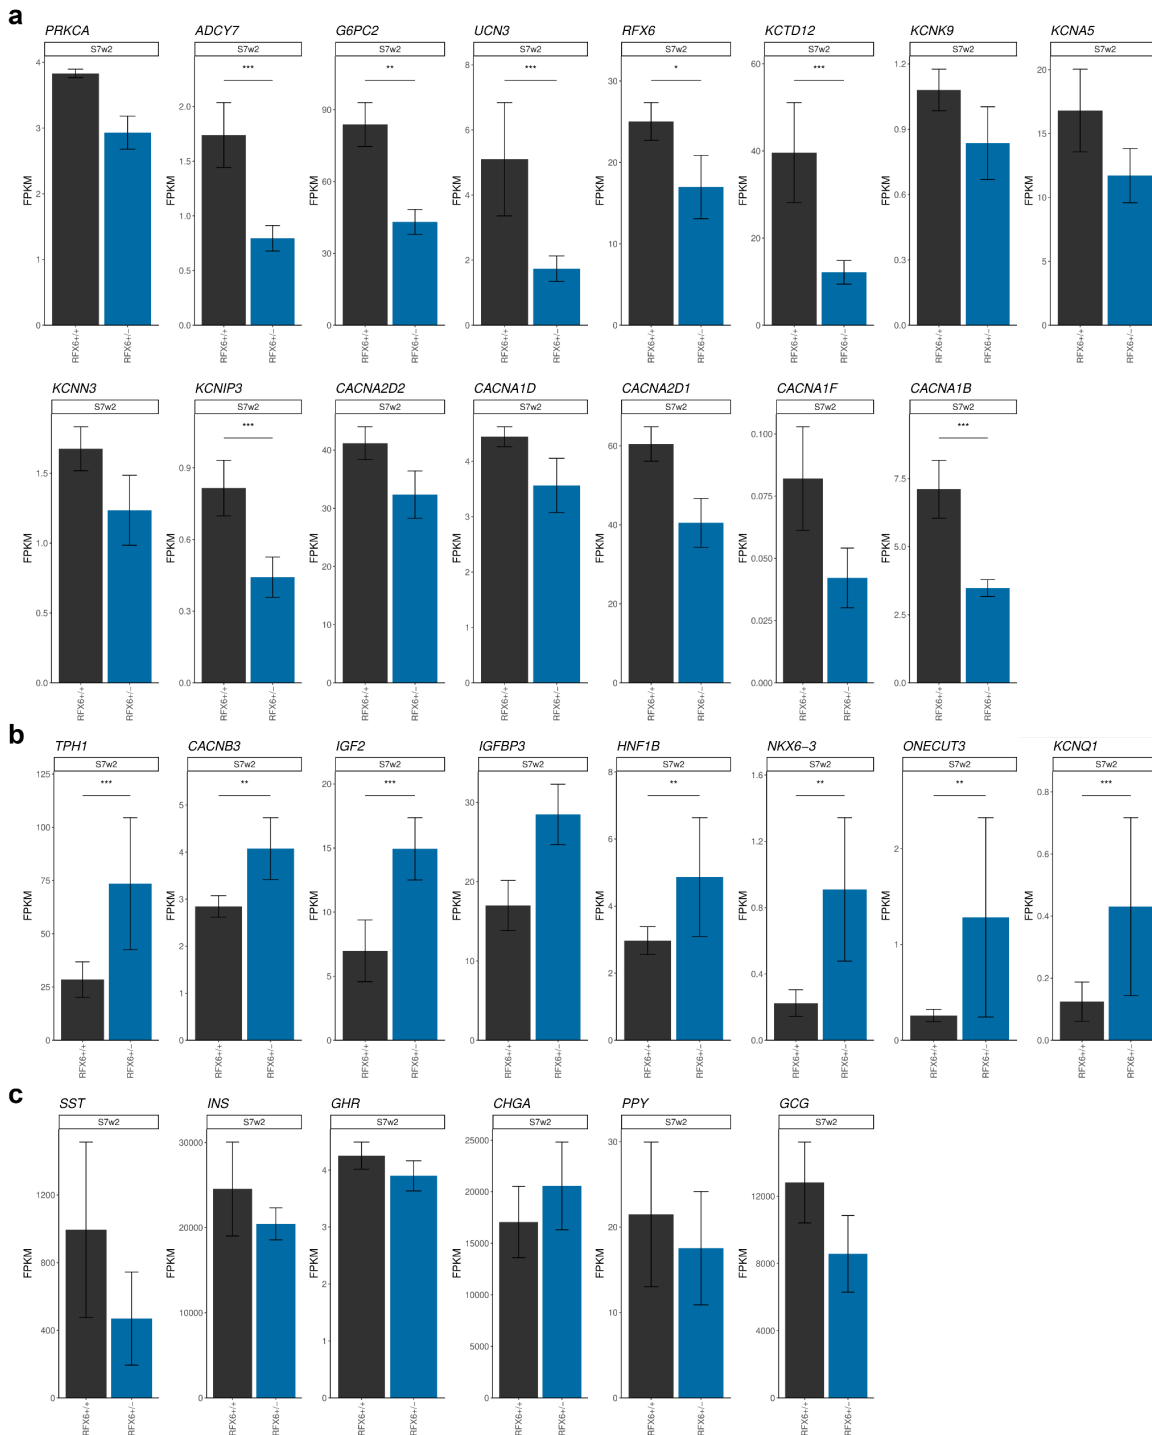

**ESM Fig. 12 Altered gene expression levels in *RFX6*<sup>+/-</sup> at S7.**

(a) Barplots of average gene expression (FPKM) of the upregulated genes heatmap in (Fig. 5c).  
 (b) Barplots of average gene expression (FPKM) of the downregulated genes heatmap in (Fig. 5d).  
 (c) Barplots of average gene expression (FPKM) of the hormone genes heatmap in (Fig. 5e).  
 Statistical significance is indicated as False Discovery Rate corrected *p* value, \*FDR<0.05, \*\*FDR<0.01, \*\*\*FDR<0.001. Data are presented as means ± SD.

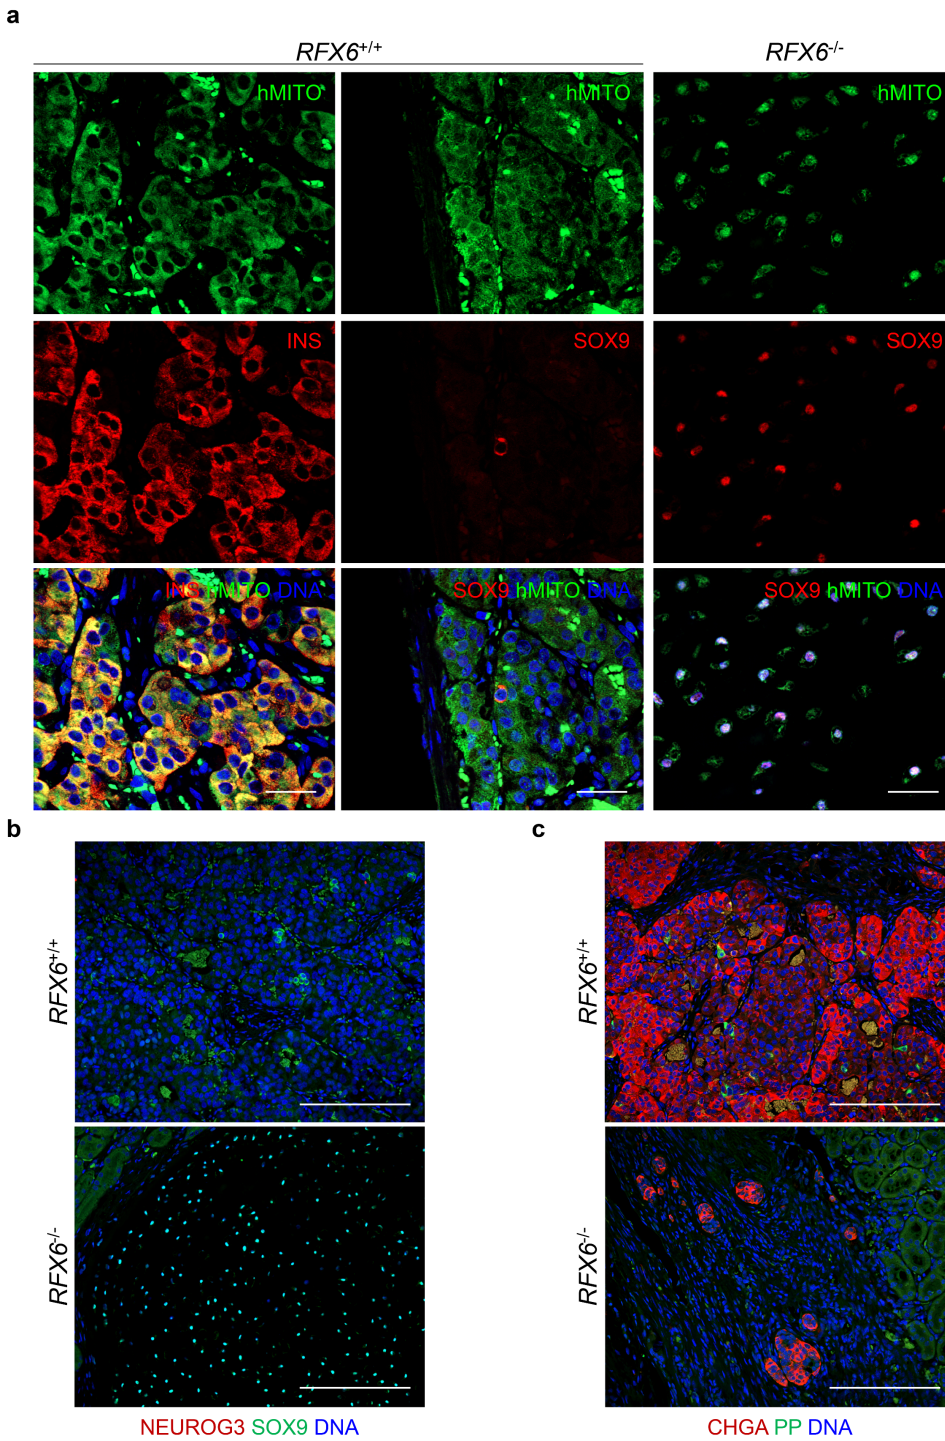

**ESM Fig. 13 Persistent expression of SOX9 but not NEUROG3 in homozygous *RFX6*<sup>-/-</sup> cells post implantation.**

(a) Immunohistochemistry showing human specific mitochondria (hMITO<sup>+</sup>), INS<sup>+</sup> and SOX9<sup>+</sup> cells at month 3 post implantation. Scale bar, 50  $\mu$ m.

(b) Immunohistochemistry showing SOX9<sup>+</sup> and NEUROG3<sup>+</sup> cells at month 3 post implantation. Scale bar, 200  $\mu$ m.

(c) Immunohistochemistry showing PP<sup>+</sup> and CHGA<sup>+</sup> cells at month 3 post implantation. Scale bar, 200  $\mu$ m.
